# Supplementary material for: Inhibition of lncRNA KCNQ1OT1 Improves Apoptosis and Chemotherapy Drug Response in Small Cell Lung Cancer by TGF-β1 Mediated Epithelial-to-Mesenchymal Transition
Source: PubMed Central journal article supplement — Cancer Res Treat. 2021 Mar 9;53(4):1042–56. doi: 10.4143/crt.2020.1208 (PMC8524015; doi:10.4143/crt.2020.1208), 2021-03-09
Supplement: crt-2020-1208_S5_Fig.pdf [file crt-2020-1208_S5_Fig.pdf]

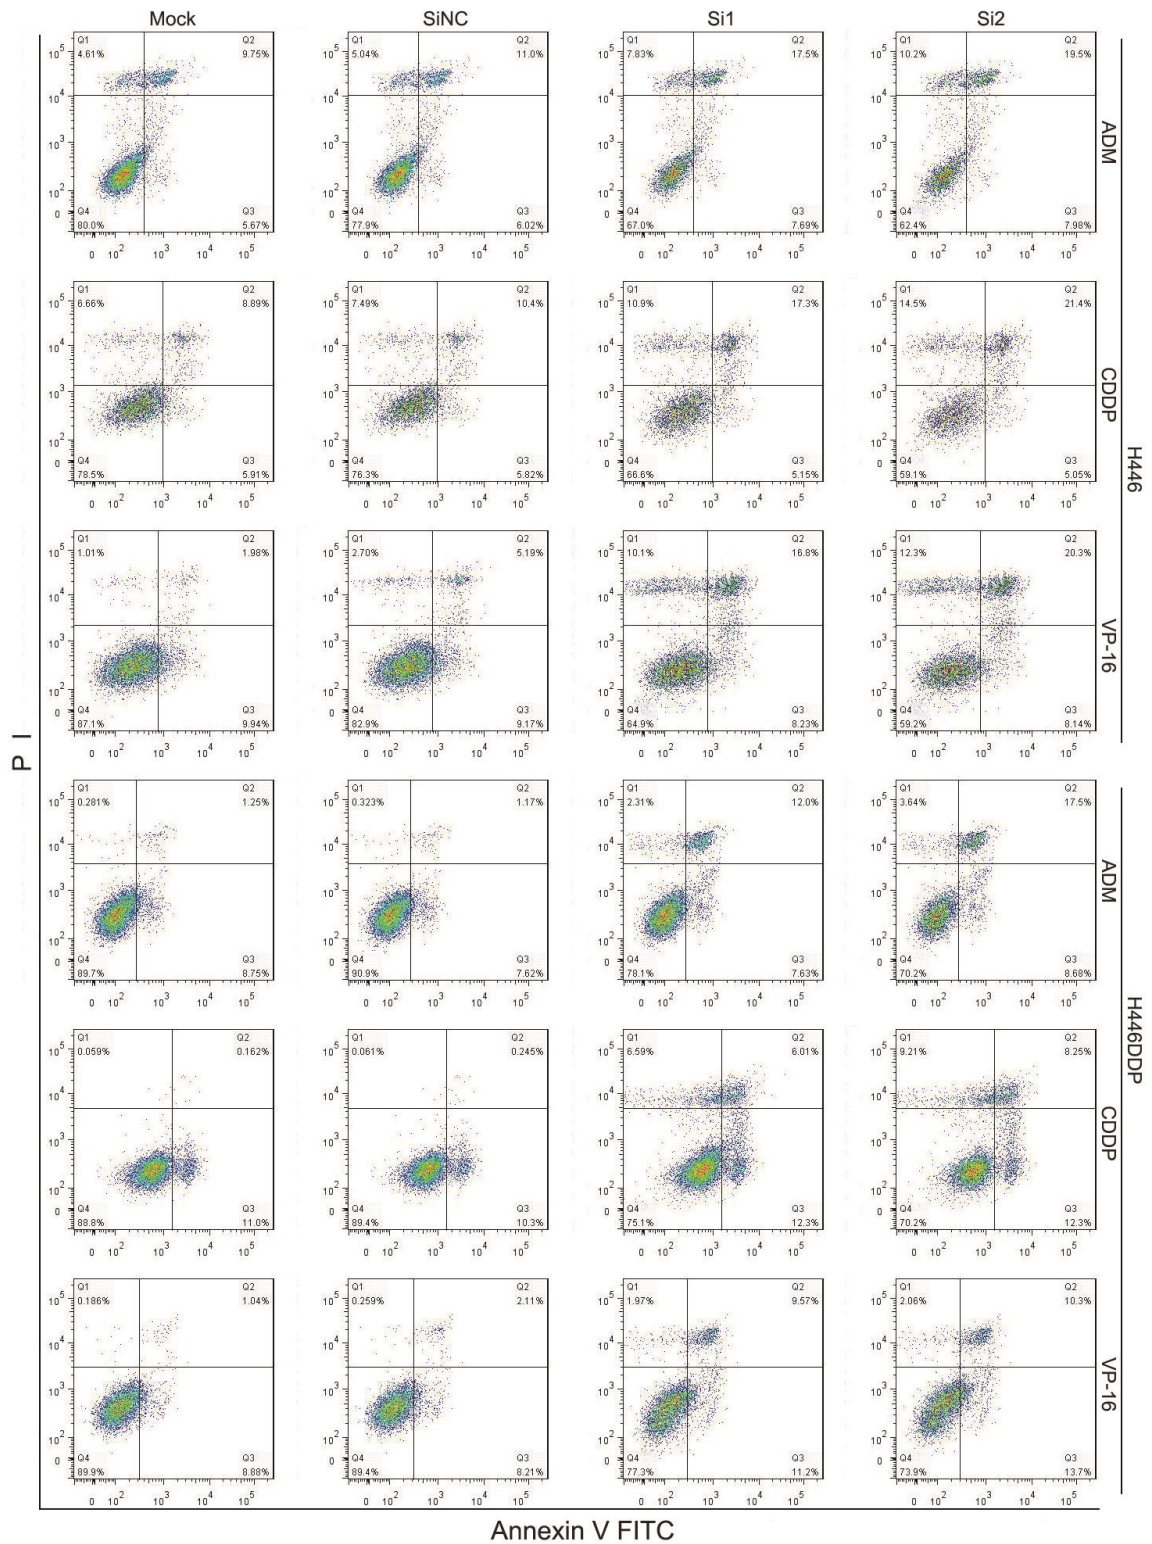

**S5 Fig.** Knockdown of KCNQ1OT1 increased apoptosis of H446 and H446DDP cells treated with chemotherapy drugs. The representative flow cytometric plots of knockdown of KCNQ1OT1 increased apoptosis of H446 and H446DDP cells treated with chemotherapy drugs. PI, propidium iodide.
