# Supplementary material for: Inhibition of lncRNA KCNQ1OT1 Improves Apoptosis and Chemotherapy Drug Response in Small Cell Lung Cancer by TGF-β1 Mediated Epithelial-to-Mesenchymal Transition
Source: PubMed Central journal article supplement — Cancer Res Treat. 2021 Mar 9;53(4):1042–56. doi: 10.4143/crt.2020.1208 (PMC8524015; doi:10.4143/crt.2020.1208), 2021-03-09
Supplement: crt-2020-1208_S6_Fig.pdf [file crt-2020-1208_S6_Fig.pdf]

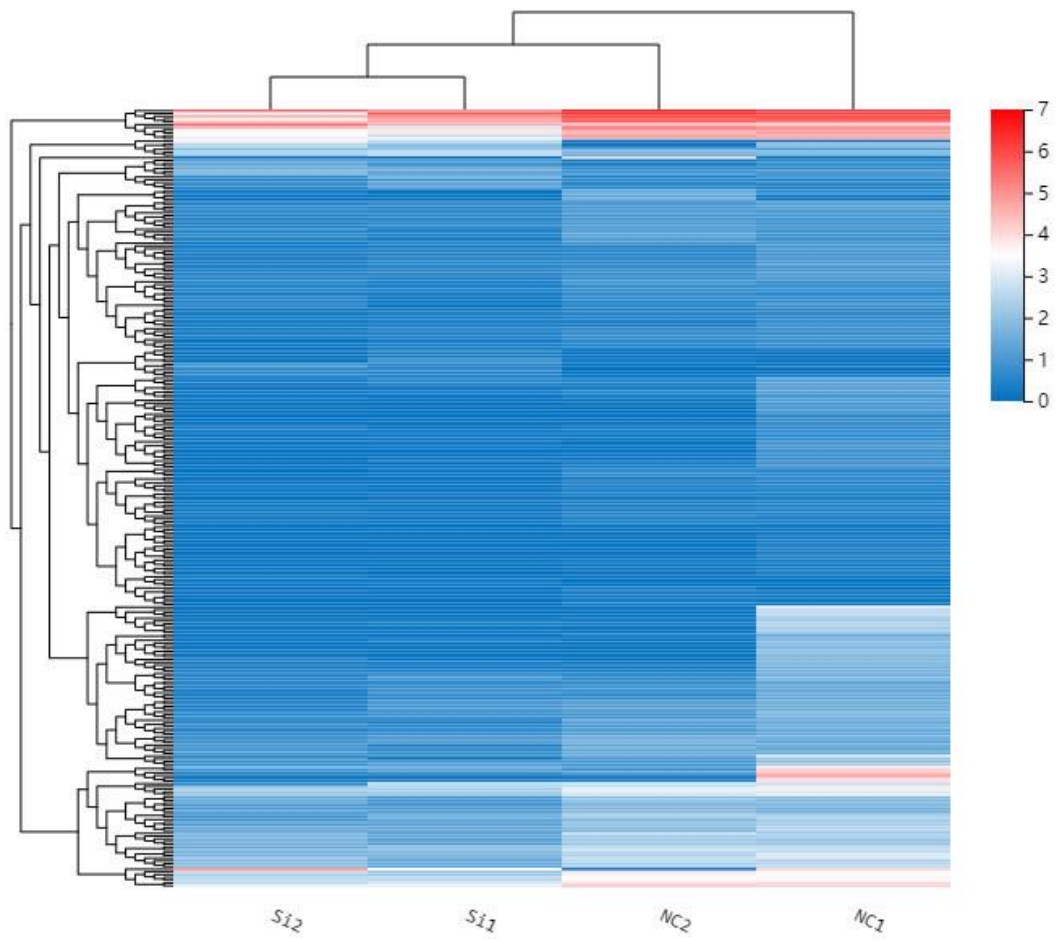

**S6 Fig.** The differentially expressed RNAs in H446DDP cells transfected with KCNQ1OT1 siRNA. The heatmap of differentially expressed RNAs in H446DDP cells transfected with KCNQ1OT1 siRNA.
